# Supplementary material for: Torulaspora delbrueckii Phenotypic and Metabolic Profiling towards Its Biotechnological Exploitation
Source: MDPI journal article supplement (doi:10.3390/jof8060569), 2022-05-26
Supplement: s1 [file s1]

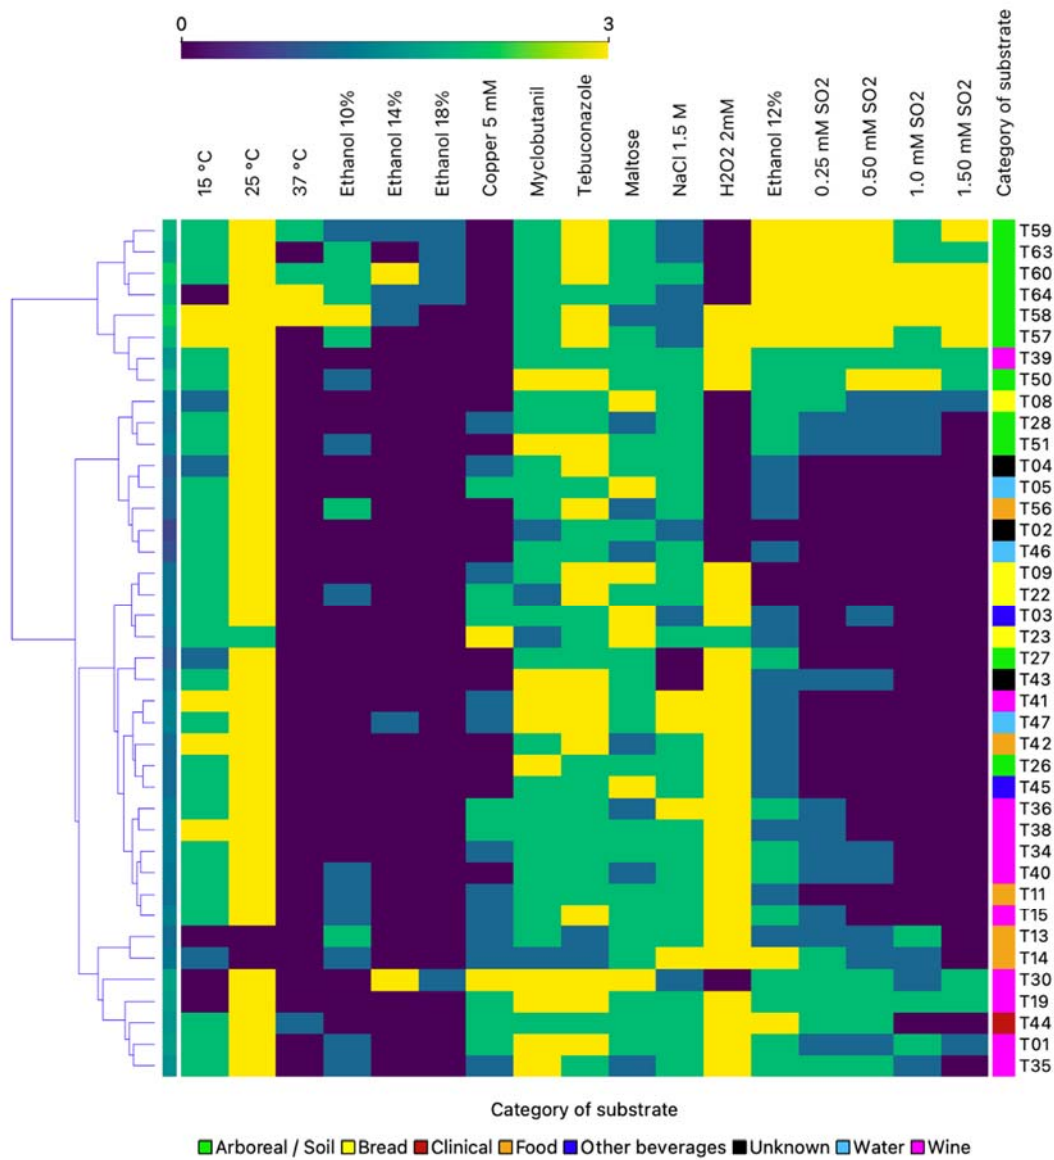

**Supplementary Figure S3:** Heatmap of phenotypic data, after the characterization of the 40 *Torulaspora delbrueckii* strains using 17 tests. Only the tests contributing with higher variability were considered in the analysis.
