# Supplementary material for: Torulaspora delbrueckii Phenotypic and Metabolic Profiling towards Its Biotechnological Exploitation
Source: MDPI journal article supplement (doi:10.3390/jof8060569), 2022-05-26
Supplement: s1 [file s1]

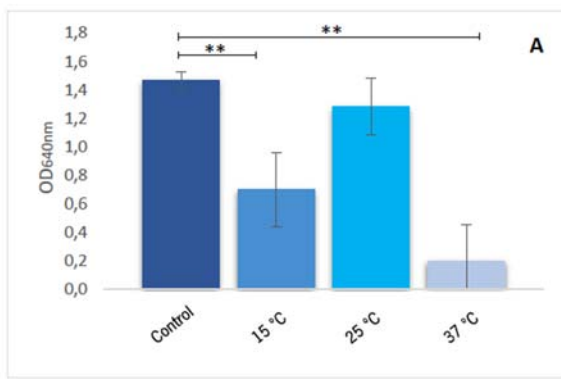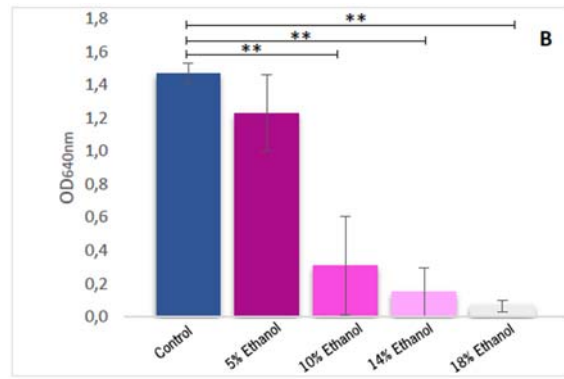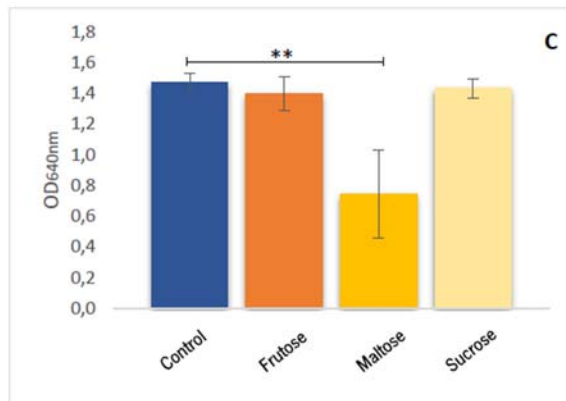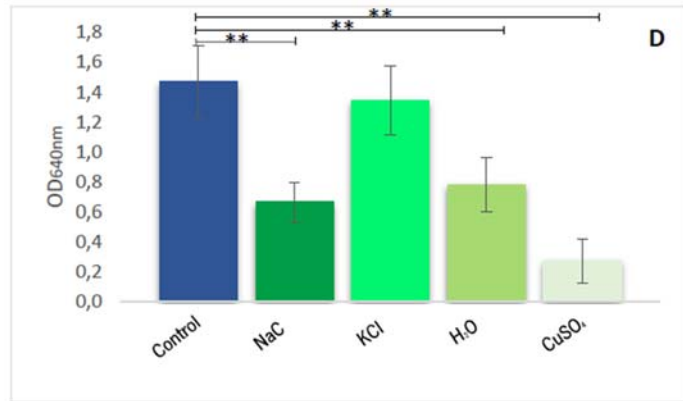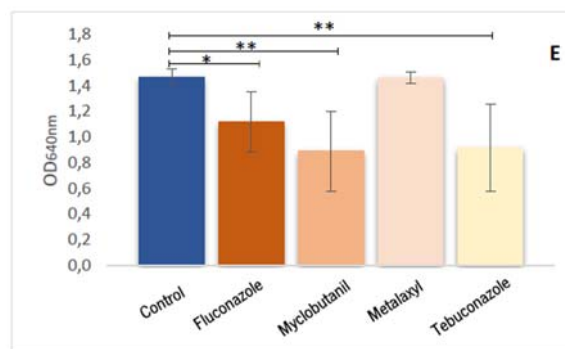

**Supplementary Figure S1:** Phenotypic data obtained after characterization of the 40 *Torulaspora delbrueckii* strains. Bars represent average of optical density determined for all isolates. **A** – comparison between temperatures; **B** – comparison between different concentrations of ethanol; **C** - effect of different carbon sources in the strains' growth; **D** – evaluation of stressful conditions; **E** – effect of fungicides in *T. delbrueckii* growth. Statistical analysis was performed applying one-way ANOVA (Fisher LSD Method), and comparing each test against the control (growth at 30 °C using glucose as carbon source). \*  $p < 0.005$ ; \*\*  $p < 0.001$
