# Supplementary material for: Torulaspora delbrueckii Phenotypic and Metabolic Profiling towards Its Biotechnological Exploitation
Source: MDPI journal article supplement (doi:10.3390/jof8060569), 2022-05-26
Supplement: s1 [file s1]

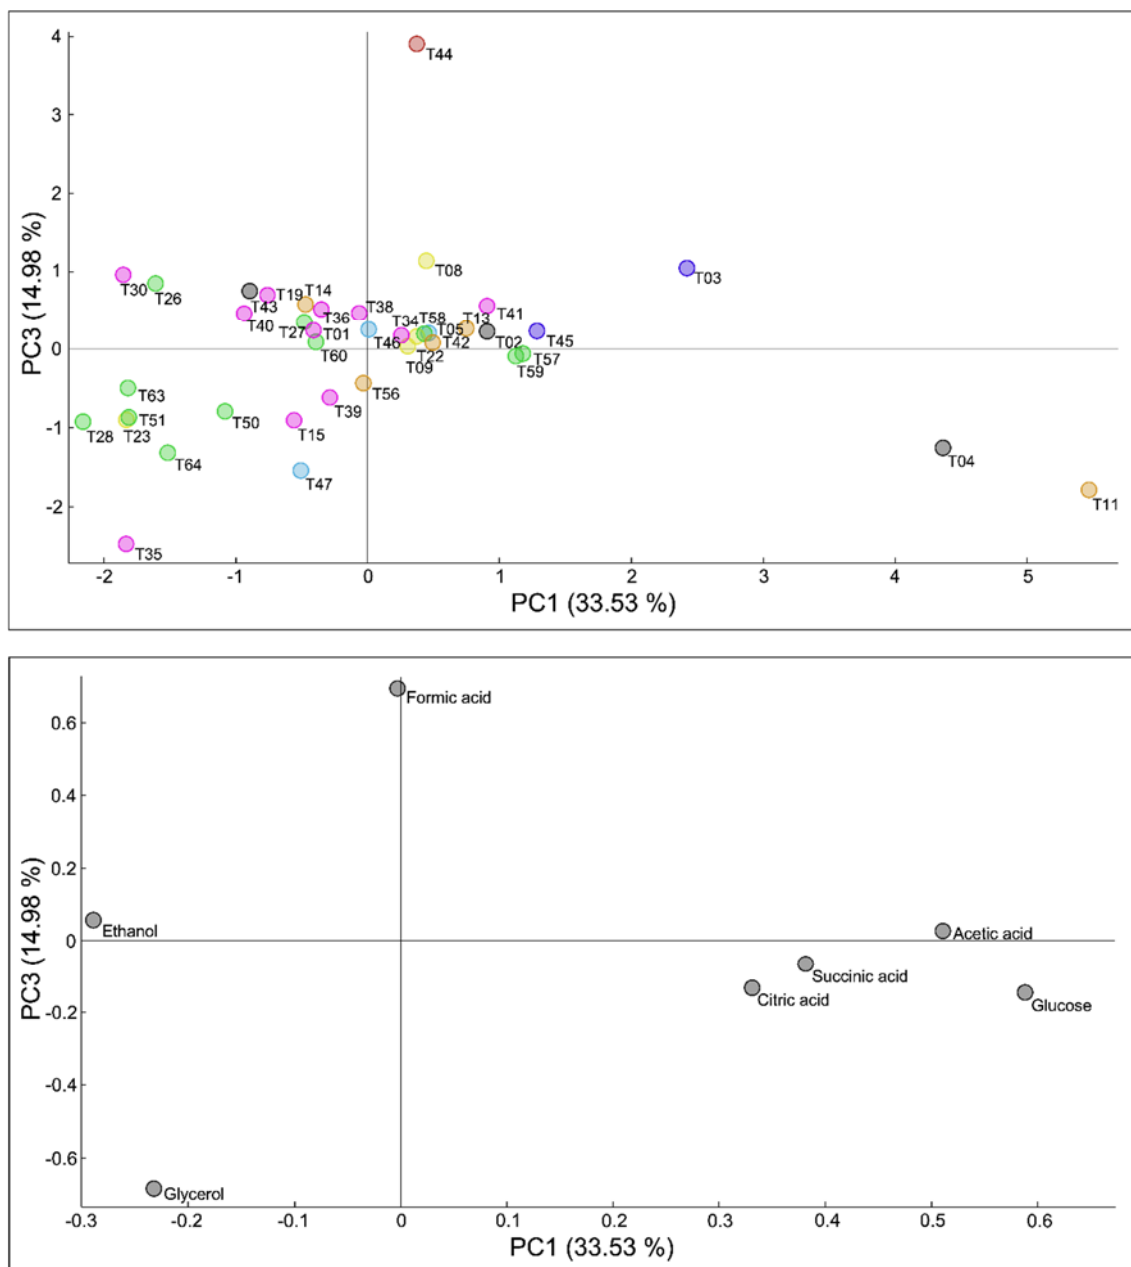

**Supplementary Figure S5:** Principal component analysis of metabolic data of 40 *T. delbrueckii* strains, showing PC1 versus PC3.

**A:** Scores – 40 strains distribution. Colours represent the technological application or origin of the strains: ● – winemaking, ● – arboreal/soil, ● – food, ● – bread, ● – water, ● – clinical, ● – other beverages, ● – unknown origin.

**B:** Loadings – concentration of 8 metabolites obtained by HPLC analysis, after 192h of fermentation
