# Supplementary material for: Torulaspora delbrueckii Phenotypic and Metabolic Profiling towards Its Biotechnological Exploitation
Source: MDPI journal article supplement (doi:10.3390/jof8060569), 2022-05-26
Supplement: s1 [file s1]

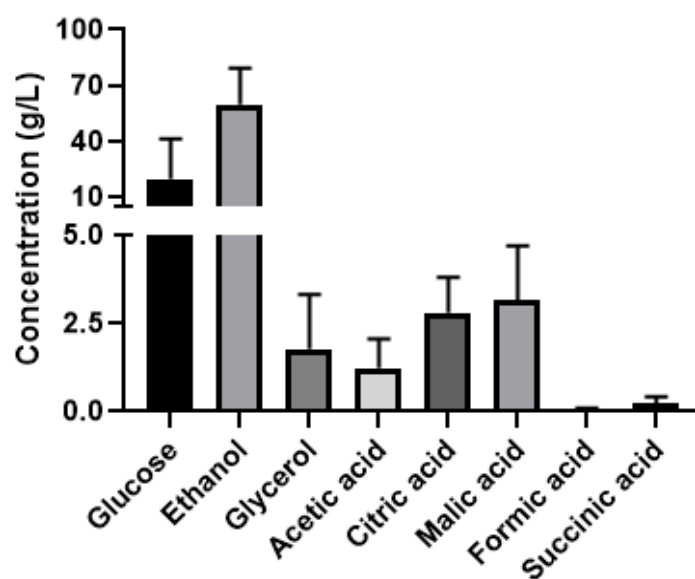

**Supplementary Figure S4** – HPLC analysis of 40 *T. delbrueckii* strains after 192h of fermentation. Bars represent average concentrations (g/L) of three replicates, plus standard deviations.
